# Supplementary material for: Adipose Stem Cell-Derived Extracellular Vesicles Induce Proliferation of Schwann Cells via Internalization
Source: PubMed Central journal article supplement (PMC7016740; doi:10.3390/cells9010163), 2020-01-09
Supplement: cells-09-00163-s001.pdf [file cells-09-00163-s001.pdf]

SUPPLEMENTARY FIGURE

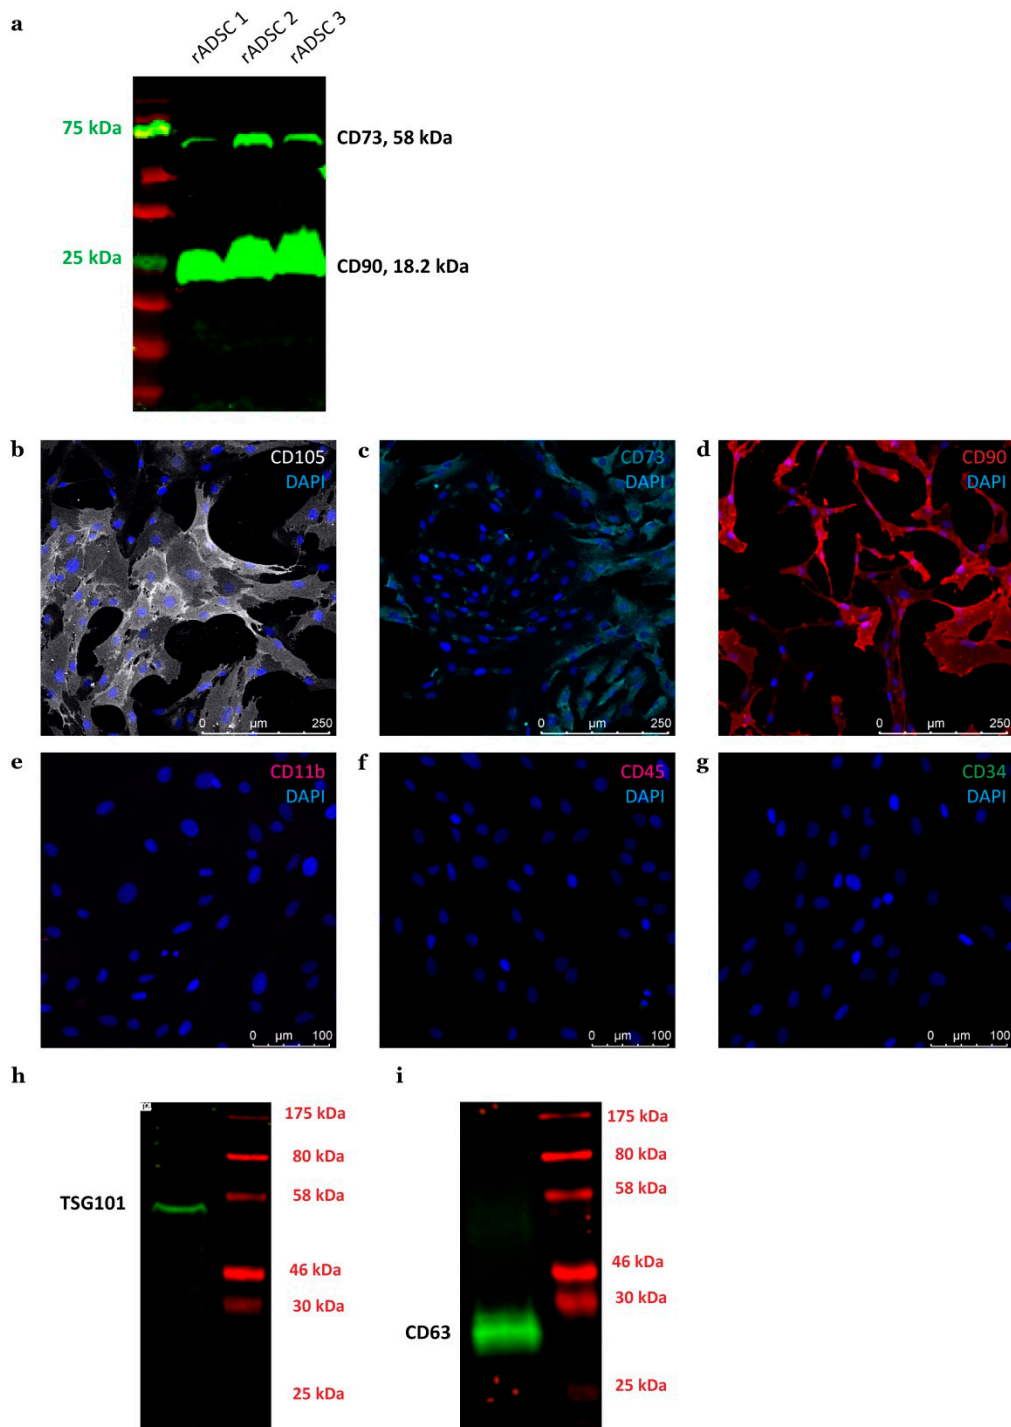

**Supplementary figure 1. Characterisation of rADSCs and rADSC-EVs.** Whole Western blot for three rADSC donors double stained against CD73 and CD90 (a). Immunofluorescence images of p3 rADSC cultures stained for CD105 (b), CD73 (c) and CD90 (d), note that positive cells can be clearly discriminated from negative cells. Immunofluorescence analysis of p3 rADSC cultures stained for CD11b (e), CD45 (f) and CD34 (g); note that no positive cells were observed. Whole Western blots for pooled rADSC-EV fractions stained against TSG101 (h) and CD63 (i).

**SUPPLEMENTARY TABLES**

**Supplementary Table 1 | Antibodies**

| 1 <sup>st</sup> Antibodies |         |               |          |                  |
|----------------------------|---------|---------------|----------|------------------|
| Reactivity                 | Species | company       | dilution | note             |
| S100                       | rabbit  | DAKO          | 1:200    | permeabilization |
| SOX10                      | mouse   | Santa Cruz    | 1:50     | permeabilization |
| vimentin                   | chicken | Invitrogen    | 1:200    | permeabilization |
| NGFR                       | rabbit  | CellSignaling | 1:400    |                  |
| CD90                       | mouse   | Santa Cruz    | 1:50     |                  |
| CD73                       | rabbit  | CellSignaling | 1:50     |                  |
| CD105                      | goat    | R&D           | 1:100    |                  |
| CD11b                      | rat     | ThermoFisher  | 1:100    |                  |
| CD45                       | rabbit  | Santa Cruz    | 1:30     |                  |
| CD34                       | mouse   | Santa Cruz    | 1:30     |                  |
| TSG101                     | rabbit  | abcam         | 1:500    |                  |
| CD63                       | mouse   | abcam         | 1:500    |                  |

| 2 <sup>nd</sup> Antibodies |             |            |          |
|----------------------------|-------------|------------|----------|
| Reactivity                 | Fluorophore | company    | dilution |
| rabbit                     | AF488Plus   | Invitrogen | 1:600    |
| mouse                      | AF594       | Invitrogen | 1:300    |
| mouse                      | AF488       | Invitrogen | 1:300    |
| chicken                    | DL650       | Invitrogen | 1:400    |
| goat                       | AF546       | Invitrogen | 1:300    |
| rat                        | AF594       | Invitrogen | 1:400    |
| rabbit                     | IRDye 800CW | LI-COR     | 1:15000  |
| mouse                      | IRDye 800CW | LI-COR     | 1:15000  |

**Supplementary Table 2 | Primer sequences used for RT-PCR**

| Gene | Primer sequence                |
|------|--------------------------------|
| NGF  | Foward: ATCGCTCTCCTTCACAGAGTTT |
|      | Reverse: TGTACGGTTCTGCCTGTACG  |
| BDNF | Foward: TACCTGGATGCCGCAAACAT   |
|      | Reverse: TGGCCTTTTGATACCGGGAC  |
| CNTF | Foward: ATGGCTTTCGCAGAGCAAAC   |
|      | Reverse: CAACGATCAGTGCTTGCCAC  |
| GDNF | Foward: CGCTGACCAGTGACTCCAAT   |
|      | Reverse: TGGTAAACCAGGCTGTCGTC  |
